# Supplementary material for: Facilitators and Barriers to Assistance Dog Puppy Raisers’ Engagement in Recommended Raising Practices
Source: MDPI journal article supplement (doi:10.3390/ani11051195), 2021-04-21
Supplement: s1 [file s1]

# Facilitators and Barriers to Assistance Dog Puppy Raisers' Engagement in Recommended Raising Practices

Dac Mai <sup>1,\*</sup>, Tiffani Howell <sup>1</sup>, Pree Benton <sup>2</sup>, Virginia Lewis <sup>3</sup>, Lynette Evans <sup>4</sup> and Pauleen C. Bennett <sup>1</sup>

<sup>1</sup> Anthrozoology Research Group, Department of Psychology and Counselling, School of Psychology and Public Health, La Trobe University, Flora Hill, VIC 3552, Australia; T.Howell@latrobe.edu.au (T.H.); Pauleen.Bennett@latrobe.edu.au (P.C.B.)

<sup>2</sup> Centre for Service and Therapy Dogs Australia, Melbourne, VIC 3162, Australia; Pree.Benton@dogsforlife.com.au

<sup>3</sup> Australian Institute for Primary Care and Ageing, La Trobe University, Bundoora, VIC 3086, Australia; V.Lewis@latrobe.edu.au

<sup>4</sup> School of Psychological Science, La Trobe University, Bundoora 3086, Victoria, Australia; L.Evans@latrobe.edu.au

\* Correspondence: Jimmy.Mai@latrobe.edu.au; Tel.: +61-035-444-7317

**Citation:** Mai, D.; Howell, T.; Benton, P.; Lewis, V.; Evans, L.; Bennett, P.C. Facilitators and Barriers to Assistance Dog Puppy Raisers' Engagement in Recommended Raising Practices. *Animals* **2021**, *11*, x. <https://doi.org/10.3390/xxxxx>

Academic Editor: Kate Hill, Naomi Cogger and Mia Cobb

Received: 1 April 2021

Accepted: 20 April 2021

Published: date

**Publisher's Note:** MDPI stays neutral with regard to jurisdictional claims in published maps and institutional affiliations.

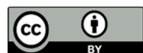

**Copyright:** © 2021 by the authors. Submitted for possible open access publication under the terms and conditions of the Creative Commons Attribution (CC BY) license (<http://creativecommons.org/licenses/by/4.0/>).

**Table S1.** Semi-structured interview schedules for puppy raisers.

| <b>Opening Question</b>                                                                                                                                                                                          |                                                                                                                                                               |
|------------------------------------------------------------------------------------------------------------------------------------------------------------------------------------------------------------------|---------------------------------------------------------------------------------------------------------------------------------------------------------------|
| Tell me about your experience with the puppy raising during the last month.                                                                                                                                      |                                                                                                                                                               |
| <b>Prompts</b>                                                                                                                                                                                                   |                                                                                                                                                               |
| At home                                                                                                                                                                                                          | Joy, difficulties associated with having the puppy at home; changes to daily routines/activities.                                                             |
| At work                                                                                                                                                                                                          | In your office, in the classroom; attitudes towards others' reactions towards the puppy's present; changes to workplace dynamic and/or personal productivity. |
| Organisation                                                                                                                                                                                                     | Attitudes towards levels of support received; feedback on program design.                                                                                     |
| Personal development                                                                                                                                                                                             | What have you learned about raising an assistance dog puppy?                                                                                                  |
|                                                                                                                                                                                                                  | Whether you learned that from our personnel or outside/online sources                                                                                         |
| Note: We will be focusing on the participants' experience. Not reporting on the puppy progress, but how the progress relates to their experience during the week. Duration: expected to be approximately 15 min. |                                                                                                                                                               |
